# Supplementary material
Source: PubMed Central journal article supplement (PMC4253492)

## Supplementary Figure S4

**A**

161

|              |   |              |                        |
|--------------|---|--------------|------------------------|
| 153-DIESMPFI | E | AFRQFQFK-169 | <i>H. sapiens</i>      |
| 153-DIESAPFV | E | ALRQFQFK-169 | <i>S. cerevisiae</i>   |
| 152-DIEGMPFV | E | AFRQFQFR-168 | <i>D. melanogaster</i> |

**B**

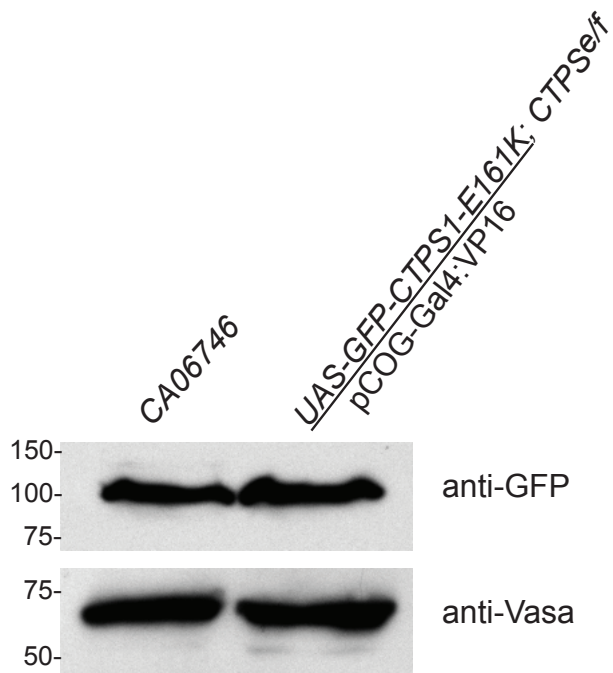

Supplement: embr0015-1184-sd4.pdf [file embr0015-1184-sd4.pdf]
