# Supplementary material
Source: PubMed Central journal article supplement (PMC4253492)

# Supplementary Figure S1

A

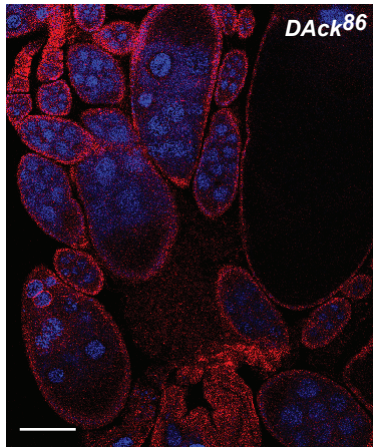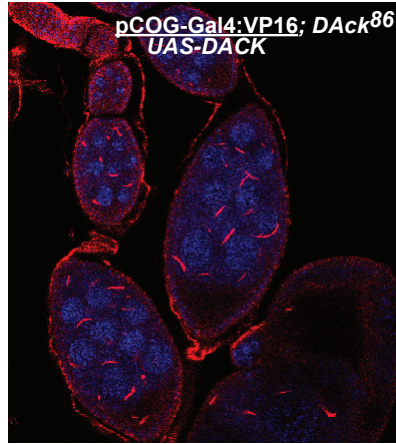

anti-Dack

B

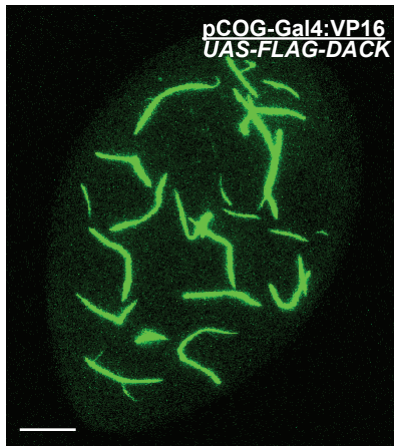

anti-FLAG

Supplement: embr0015-1184-sd1.pdf [file embr0015-1184-sd1.pdf]

Supplementary Figure S2

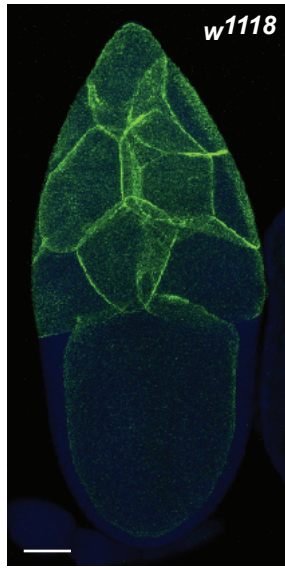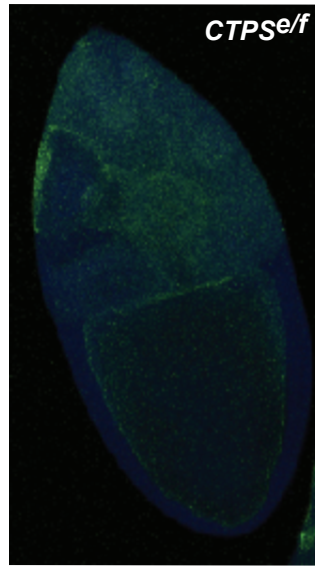

Supplement: embr0015-1184-sd2.pdf [file embr0015-1184-sd2.pdf]

# Supplementary Figure S5

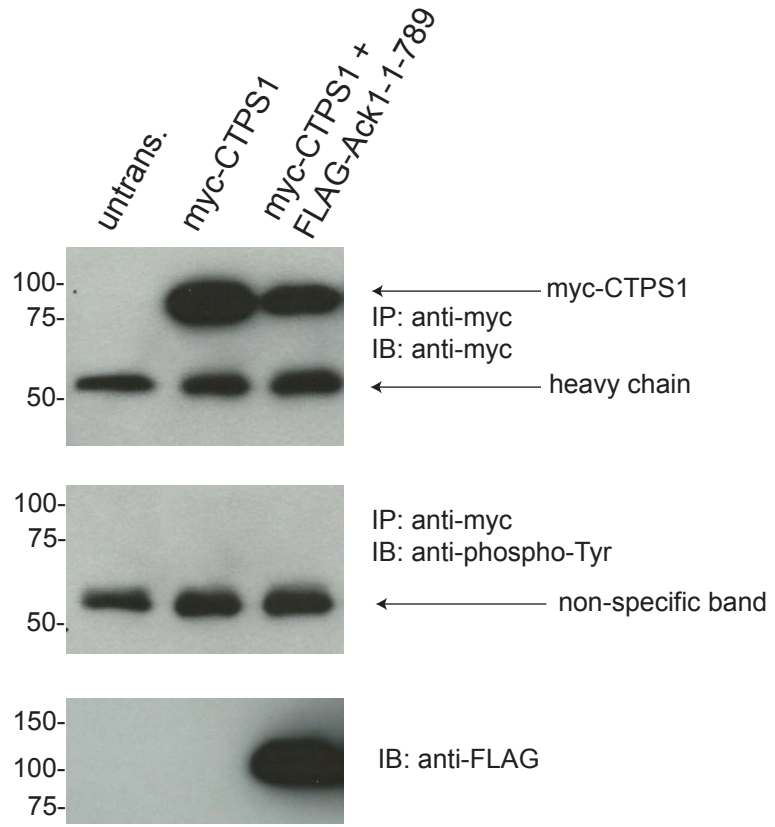

Supplement: embr0015-1184-sd5.pdf [file embr0015-1184-sd5.pdf]
